# Supplementary material for: Magnetic Assessment of Transplanted Tillandsia spp.: Biomonitors of Air Particulate Matter for High Rainfall Environments
Source: MDPI journal article supplement (doi:10.3390/atmos14020213), 2023-01-19
Supplement: s1 [file s1]

# Supplementary Materials: Magnetic assessment of transplanted *Tillandsia spp.*: biomonitors of air particulate matter for high rainfall environments

Daniela Buitrago Posada <sup>1,2,3</sup>, Marcos A. E. Chaparro <sup>1,2,\*</sup> and José Duque Trujillo <sup>3</sup>

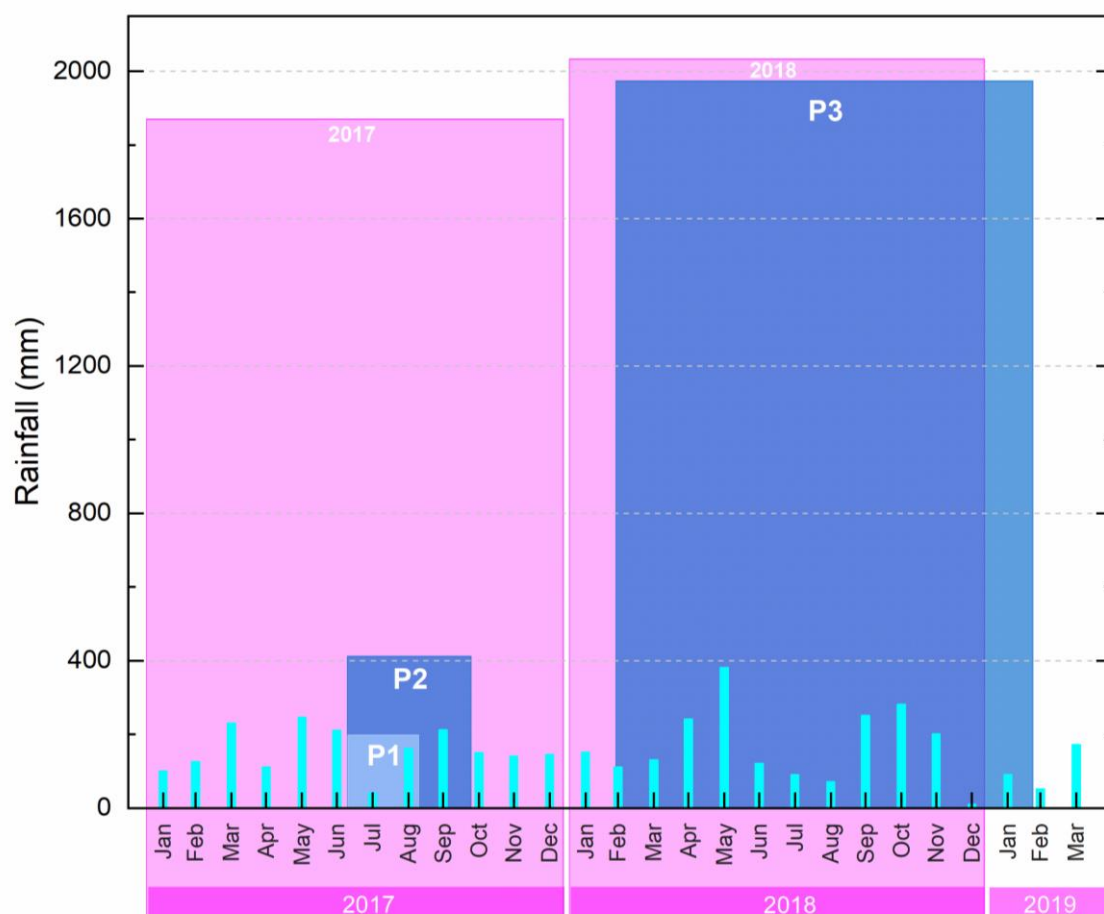

**Figure S1.** Monthly rainfall during exposure periods. Data provided by IDEAM [30]. Rainfall of 200 mm, 411 mm, and 1970 mm were recorded for periods P1, P2, and P3, respectively. Annual rainfall is 1864 and 2030 mm for 2017 and 2018, respectively.

**Table S1.** Measurements of magnetic susceptibility  $\chi$  of *Tillandsia recurvata* and *Tillandsia usneoides* for exposure periods. Cover (C) and uncover (UC) exposure conditions.

|                | <i>Exposure condition</i> | <i>n</i> | $\chi$ ( $10^{-8} \text{ m}^3\text{kg}^{-1}$ ) |             |                  |                           |
|----------------|---------------------------|----------|------------------------------------------------|-------------|------------------|---------------------------|
|                |                           |          | Median                                         | Mean (s.d.) | <i>min _ max</i> | <i>Increase (of mean)</i> |
| <b>Control</b> | --                        | 21       | -5.1                                           | -5.8 (3.9)  | -13.3 _ 0.0      | 0                         |
| <b>P1</b>      | C+UC                      | 36       | 4.7                                            | 6.1 (6.4)   | -2.5 _ 25.9      | 2.1                       |
| <b>P2</b>      | C+UC                      | 36       | 9.0                                            | 13.4 (13.9) | 1.2 _ 65.4       | 3.3                       |
| <b>P3</b>      | C+UC                      | 46       | 36.0                                           | 47.9 (37.6) | 8.0 _ 164.2      | 9.2                       |

**Table S2.** Magnetic susceptibility  $\chi$  for species *Tillandsia recurvata* and *Tillandsia usneoides*. Cover (C) and uncover (UC) exposure conditions.

|                |                           | $\chi$ ( $10^{-8} \text{ m}^3\text{kg}^{-1}$ ) |        |             |                  |                           |                    |        |             |                  |                           |
|----------------|---------------------------|------------------------------------------------|--------|-------------|------------------|---------------------------|--------------------|--------|-------------|------------------|---------------------------|
|                |                           | <i>T.recurvata</i>                             |        |             |                  |                           | <i>T.usneoides</i> |        |             |                  |                           |
|                | <i>Exposure condition</i> | <i>n</i>                                       | Median | Mean (s.d.) | <i>min _ max</i> | <i>Increase (of mean)</i> | <i>n</i>           | Median | Mean (s.d.) | <i>min _ max</i> | <i>Increase (of mean)</i> |
| <b>Control</b> | --                        | 21                                             | -5.1   | -5.8 (3.9)  | -13.3 _ 0.0      | 0                         |                    |        |             |                  |                           |
| <b>P1</b>      | C + UC                    | 18                                             | 3.9    | 5.8 (7.4)   | -2.5 _ 25.9      | 2.0                       | 18                 | 5.1    | 6.4 (5.5)   | 0.4 _ 17.7       | 2.1                       |
| <b>P2</b>      | C + UC                    | 18                                             | 10.0   | 14.0 (17.3) | 1.2 _ 65.4       | 3.4                       | 18                 | 8.9    | 12.8 (9.7)  | 3.4 _ 34.2       | 3.2                       |
| <b>P3</b>      | C + UC                    | 46                                             | 36.0   | 47.9 (37.6) | 8.0 _ 164.2      | 9.2                       | --                 | --     | --          | --               | --                        |

**Table S3.** Descriptive statistics and Kruskal-Wallis test for transplanted samples (Campus, this study) and native samples (Industrial, Residential and Vehicular, [33]). Statistical differences in median values of  $H_{cr}$  are indicated. YES indicates that differences are significant at the 0.05 level.

| Groups               | Variable      | N   | Median          | min _ max                     |
|----------------------|---------------|-----|-----------------|-------------------------------|
| Campus               | $H_{cr}$ (mT) | 111 | 37.1            | 27.7 _ 40.7                   |
| Industrial           | $H_{cr}$ (mT) | 22  | 36.5            | 32.5 _ 42.7                   |
| Residential          | $H_{cr}$ (mT) | 93  | 34.8            | 26.2 _ 40.5                   |
| Vehicular            | $H_{cr}$ (mT) | 67  | 35.8            | 23.8 _ 42.1                   |
| Kruskal-Wallis Test  |               |     |                 |                               |
|                      | Chi-Square    | DF  | Prob>Chi-Square | Differences at the 0.05 level |
| $H_{cr}$             |               |     |                 |                               |
| All                  | 32.457        | 3   | 4.19E-07        | YES                           |
| Campus - Industrial  | 0.397         | 1   | 5.29E-01        | NO                            |
| Campus - Residential | 32.785        | 1   | 1.03E-08        | YES                           |
| Campus - Vehicular   | 1.773         | 1   | 1.83E-01        | NO                            |

**Table S4.** Kruskal-Wallis test for transplanted samples exposed over periods P1, P2, and P3. Statistical differences in median values of  $\chi$  are indicated. YES indicates that differences are significant at the 0.05 level.

| Kruskal-Wallis Test |            |    |                 |                               |
|---------------------|------------|----|-----------------|-------------------------------|
| Groups              | Chi-Square | DF | Prob>Chi-Square | Differences at the 0.05 level |
| $\chi$              |            |    |                 |                               |
| P1 -P2              | 9.044      | 1  | 2.64E-03        | YES                           |
| P1 -P3              | 52.510     | 1  | 4.28E-13        | YES                           |
| P2 - P3             | 35.428     | 1  | 2.65E-09        | YES                           |

**Table S5.** Description of study zones and magnetic susceptibility  $\chi$  of transplants for each Air Exposure Station.

| Zone                                                                                                                                                    | Site | n  | $\chi$ ( $10^{-8} \text{ m}^3\text{kg}^{-1}$ ) |      |         |        |         |
|---------------------------------------------------------------------------------------------------------------------------------------------------------|------|----|------------------------------------------------|------|---------|--------|---------|
|                                                                                                                                                         |      |    | Mean                                           | s.d. | Minimum | Median | Maximum |
| <b>Regional avenue:</b> west, one of the main roads in Aburrá Valley, metro tracks, Medellin river, industrial zone, and regular traffic of big trucks. | AES3 | 8  | 16.8                                           | 5.3  | 13.1    | 15.5   | 29.7    |
|                                                                                                                                                         | AES6 | 16 | 25.6                                           | 16.2 | 6.2     | 23.9   | 53.9    |
|                                                                                                                                                         | AES9 | 16 | 76.6                                           | 50.3 | 12.5    | 80.7   | 164.1   |
| <b>Parking:</b> Vehicular activity inside the campus, near Las Vegas Avenue.                                                                            | AES1 | 8  | 7.4                                            | 5.7  | 0.1     | 5.5    | 17.8    |
|                                                                                                                                                         | AES8 | 16 | 24.7                                           | 22.3 | -0.6    | 20.2   | 66.3    |
| <b>Gardens:</b><br>Internal green areas within the campus with some shielding but near vehicle passage                                                  | AES2 | 8  | 3.6                                            | 4.2  | -0.6    | 1.9    | 12.6    |
|                                                                                                                                                         | AES5 | 16 | 10.0                                           | 8.2  | -2.4    | 10.2   | 24.6    |
| <b>Las Vegas Avenue:</b> east, vehicular traffic of private cars and public buses, residential area.                                                    | AES4 | 14 | 7.9                                            | 8.8  | -0.4    | 3.6    | 27.8    |
|                                                                                                                                                         | AES7 | 16 | 23.6                                           | 17.3 | 3.0     | 21.9   | 48.8    |

**Table S6.** Kruskal-Wallis test for transplanted species exposed over periods P1, P2, and P3. Statistical differences in median values of  $\chi$  are indicated. YES indicates that differences are significant at the 0.05 level. Cover (C) and uncover (UC) exposure conditions; T.r: *Tillandsia recurvata*; T.u: *Tillandsia usneoides*.

| Kruskal-Wallis Test |            |    |                 |                               |
|---------------------|------------|----|-----------------|-------------------------------|
| Groups              | Chi-Square | DF | Prob>Chi-Square | Differences at the 0.05 level |
| $\chi$ (P1)         |            |    |                 |                               |
| T.r - T.u           | 0.872      | 1  | 3.51E-01        | NO                            |
| C_T.r - UC_T.r      | 0.195      | 1  | 6.59E-01        | NO                            |
| C_T.u - UC_T.u      | 0.330      | 1  | 5.66E-01        | NO                            |
| C_T.r - C_T.u       | 0.860      | 1  | 3.54E-01        | NO                            |
| UC_T.r - UC_T.u     | 0.049      | 1  | 8.25E-01        | NO                            |
| $\chi$ (P2)         |            |    |                 |                               |
| T.r - T.u           | 0.289      | 1  | 5.91E-01        | NO                            |
| C_T.r - UC_T.r      | 0.049      | 1  | 8.25E-01        | NO                            |
| C_T.u - UC_T.u      | 0.008      | 1  | 9.30E-01        | NO                            |
| C_T.r - C_T.u       | 0.329      | 1  | 5.66E-01        | NO                            |
| UC_T.r - UC_T.u     | 0.002      | 1  | 9.65E-01        | NO                            |
| $\chi$ (P3)         |            |    |                 |                               |
| C_T.r - UC_T.r      | 0.559      | 1  | 4.55E-01        | NO                            |
